# Supplementary material for: Quantification of amyloid fibril polymorphism by nano-morphometry reveals the individuality of filament assembly
Source: bioRxiv or medRxiv preprint supplement (doi:10.1101/2020.01.14.905877), 2020-01-15
Supplement: Supplementary file [file media-1.pdf]

1

2           **Quantification of amyloid fibril polymorphism by nano-**  
3           **morphometry reveals the individuality of filament assembly**

4

5                           **Supplementary Information**

6

7   Liam D. Aubrey <sup>1†</sup>, Ben J. F. Blakeman <sup>1†</sup>, Liisa Lutter <sup>1</sup>, Christopher J. Serpell <sup>2</sup>, Mick F.  
8   Tuite <sup>1</sup>, Louise C. Serpell <sup>3</sup>, Wei-Feng Xue <sup>1\*</sup>

9

10   <sup>1</sup> Kent Fungal Group, School of Biosciences, University of Kent, CT2 7NJ, Canterbury, UK

11   <sup>2</sup> School of Physical Sciences, University of Kent, CT2 7NH, Canterbury, UK

12   <sup>3</sup> Sussex Neuroscience, School of Life Sciences, University of Sussex, BN1 6NN, Falmer,  
13   Brighton, UK

14   <sup>†</sup> Authors contributed equally to this study

15   \* Correspondence to: W.F.Xue@kent.ac.uk; Tel +44-(0)1227 824821

16

17

18

19

20

21   Key words: amyloid / fibril structure / polymorphism / self-assembly / atomic force microscopy  
22   / image analysis

25 **Supplementary Table SI 1: Morphometric parameters for individual fibrils assembled**  
 26 **from the peptides HYFNIF, RVFNIM and VIYKI.** The contour length of the section of each  
 27 fibril used to estimate their morphometric parameters and the estimated radius of the cantilever  
 28 tip used to image each fibril are also shown for each individual fibril. The fibril number is the  
 29 index number of each of the individual fibrils and were used throughout.  
 30

| <b>Fibril number</b> | <b>Length / nm</b> | <b>Estimated Tip-Radius / nm</b> | <b>Average Height, <math>h_{mean}</math> / nm</b> | <b>Directional Periodic Frequency, <math>dpf</math> / nm<sup>-1</sup></b> | <b>Minimum Height, <math>h_{min}</math> / nm</b> | <b>Maximum Height, <math>h_{max}</math> / nm</b> | <b>Cross-Sectional Area, <math>csa</math> / nm<sup>2</sup></b> |
|----------------------|--------------------|----------------------------------|---------------------------------------------------|---------------------------------------------------------------------------|--------------------------------------------------|--------------------------------------------------|----------------------------------------------------------------|
| <b>HYFNIF</b>        |                    |                                  |                                                   |                                                                           |                                                  |                                                  |                                                                |
| 1                    | 4233.6             | 3.3                              | 6.38                                              | -0.01133                                                                  | 5.06                                             | 7.97                                             | 30.15                                                          |
| 2                    | 2919.0             | 3.1                              | 8.76                                              | -0.01882                                                                  | 7.78                                             | 9.82                                             | 50.60                                                          |
| 3                    | 6382.6             | 3.5                              | 7.88                                              | -0.02459                                                                  | 7.08                                             | 8.62                                             | 44.58                                                          |
| 4                    | 6230.5             | 7.9                              | 9.58                                              | -0.01011                                                                  | 7.79                                             | 11.18                                            | 62.38                                                          |
| 5                    | 6884.2             | 8.0                              | 10.46                                             | -0.01351                                                                  | 9.48                                             | 11.32                                            | 82.23                                                          |
| 6                    | 1184.8             | 6.8                              | 6.51                                              | 0.01348                                                                   | 5.74                                             | 7.23                                             | 33.06                                                          |
| 7                    | 1800.4             | 11.8                             | 7.41                                              | -0.02497                                                                  | 6.69                                             | 7.94                                             | 42.87                                                          |
| 8                    | 863.6              | 8.7                              | 6.29                                              | -0.01387                                                                  | 5.52                                             | 7.21                                             | 29.80                                                          |
| 9                    | 2224.9             | 7.3                              | 7.42                                              | -0.00943                                                                  | 6.69                                             | 8.33                                             | 45.76                                                          |
| 10                   | 2222.0             | 11.2                             | 9.00                                              | -0.01664                                                                  | 8.10                                             | 9.81                                             | 58.98                                                          |
| 11                   | 1604.3             | 12.5                             | 6.39                                              | -0.00996                                                                  | 5.36                                             | 7.04                                             | 31.87                                                          |
| 12                   | 2353.7             | 12.7                             | 6.11                                              | -0.01401                                                                  | 5.28                                             | 7.01                                             | 25.41                                                          |
| 13                   | 2708.0             | 9.3                              | 6.94                                              | -0.01181                                                                  | 6.05                                             | 8.15                                             | 42.06                                                          |
| 14                   | 1785.8             | 12.1                             | 7.05                                              | -0.00951                                                                  | 6.15                                             | 8.17                                             | 33.87                                                          |
| 15                   | 1294.0             | 9.8                              | 6.96                                              | -0.01157                                                                  | 6.05                                             | 8.26                                             | 46.20                                                          |
| 16                   | 1056.8             | 11.4                             | 6.51                                              | -0.01133                                                                  | 5.87                                             | 7.12                                             | 34.55                                                          |
| 17                   | 629.4              | 8.7                              | 7.25                                              | -0.00950                                                                  | 6.42                                             | 8.34                                             | 41.34                                                          |
| 18                   | 951.5              | 12.1                             | 7.50                                              | -0.02098                                                                  | 6.95                                             | 7.97                                             | 47.67                                                          |
| 19                   | 1074.4             | 10.5                             | 7.38                                              | -0.00743                                                                  | 6.25                                             | 9.12                                             | 42.75                                                          |
| 20                   | 3275.9             | 12.9                             | 6.56                                              | -0.00824                                                                  | 5.62                                             | 7.82                                             | 30.91                                                          |
| 21                   | 2470.9             | 14.0                             | 6.25                                              | -0.00970                                                                  | 5.12                                             | 7.89                                             | 25.79                                                          |
| 22                   | 1185.7             | 12.1                             | 6.41                                              | -0.01263                                                                  | 5.64                                             | 7.32                                             | 31.38                                                          |
| 23                   | 2775.3             | 13.3                             | 6.51                                              | -0.01224                                                                  | 5.70                                             | 7.48                                             | 30.63                                                          |
| 24                   | 3893.7             | 12.1                             | 6.78                                              | -0.00821                                                                  | 5.68                                             | 7.97                                             | 33.35                                                          |
| 25                   | 2227.9             | 12.0                             | 6.34                                              | -0.01569                                                                  | 5.47                                             | 7.28                                             | 28.42                                                          |
| 26                   | 4243.1             | 11.4                             | 7.45                                              | -0.00801                                                                  | 6.67                                             | 8.41                                             | 40.46                                                          |
| 27                   | 6256.3             | 11.7                             | 7.13                                              | -0.00831                                                                  | 6.44                                             | 8.07                                             | 37.42                                                          |
| 28                   | 1362.6             | 12.8                             | 6.89                                              | -0.01025                                                                  | 5.84                                             | 8.66                                             | 28.81                                                          |
| 29                   | 389.7              | 2.3                              | 7.08                                              | -0.02556                                                                  | 6.10                                             | 7.94                                             | 31.07                                                          |
| 30                   | 799.8              | 5.8                              | 5.18                                              | 0.00749                                                                   | 4.40                                             | 5.79                                             | 20.46                                                          |
| 31                   | 1669.9             | 2.0                              | 7.63                                              | -0.00957                                                                  | 6.76                                             | 8.54                                             | 33.77                                                          |
| 32                   | 796.9              | 2.4                              | 7.14                                              | -0.02380                                                                  | 6.06                                             | 8.00                                             | 33.06                                                          |
| 33                   | 896.5              | 1.9                              | 7.69                                              | -0.01002                                                                  | 6.92                                             | 8.76                                             | 34.53                                                          |
| 34                   | 1037.1             | 1.1                              | 6.04                                              | -0.01925                                                                  | 5.15                                             | 7.00                                             | 46.76                                                          |
| 35                   | 1869.3             | 5.6                              | 5.94                                              | -0.01977                                                                  | 5.15                                             | 6.85                                             | 24.15                                                          |

|    |        |      |       |          |      |       |        |
|----|--------|------|-------|----------|------|-------|--------|
| 36 | 914.1  | 4.7  | 6.33  | -0.01201 | 5.54 | 7.40  | 26.40  |
| 37 | 981.5  | 4.0  | 6.05  | -0.02034 | 4.98 | 7.02  | 27.18  |
| 38 | 2088.9 | 3.3  | 6.32  | -0.01722 | 5.44 | 7.24  | 27.40  |
| 39 | 1517.6 | 5.0  | 7.11  | -0.00987 | 6.11 | 8.46  | 29.59  |
| 40 | 2504.9 | 6.7  | 7.44  | -0.01835 | 6.43 | 8.24  | 38.93  |
| 41 | 4174.8 | 7.3  | 7.72  | -0.01652 | 6.75 | 8.56  | 39.17  |
| 42 | 1391.6 | 5.6  | 6.50  | -0.01506 | 5.56 | 7.67  | 25.61  |
| 43 | 999.0  | 3.9  | 5.90  | -0.01598 | 4.98 | 6.78  | 21.07  |
| 44 | 2062.5 | 4.5  | 7.52  | -0.01598 | 6.51 | 8.62  | 35.99  |
| 45 | 2042.0 | 5.7  | 9.92  | -0.00978 | 8.06 | 12.06 | 57.88  |
| 46 | 533.2  | 7.5  | 7.38  | -0.01121 | 6.14 | 8.97  | 33.31  |
| 47 | 1880.9 | 4.1  | 7.85  | -0.01647 | 6.58 | 9.00  | 43.65  |
| 48 | 612.3  | 5.6  | 7.68  | -0.01464 | 6.15 | 9.16  | 35.66  |
| 49 | 1432.6 | 5.9  | 7.49  | -0.01115 | 6.50 | 8.64  | 34.90  |
| 50 | 3155.3 | 10.9 | 6.22  | -0.00950 | 5.40 | 7.01  | 41.08  |
| 51 | 3638.7 | 12.4 | 6.10  | -0.01373 | 5.10 | 7.16  | 44.01  |
| 52 | 5622.1 | 13.1 | 8.85  | -0.01671 | 7.84 | 9.65  | 83.03  |
| 53 | 1286.1 | 9.0  | 6.14  | -0.01474 | 5.10 | 7.10  | 31.87  |
| 54 | 726.6  | 13.0 | 6.07  | -0.01371 | 5.12 | 7.07  | 42.14  |
| 55 | 3747.1 | 12.5 | 5.44  | -0.01520 | 4.61 | 6.21  | 40.52  |
| 56 | 3295.9 | 11.5 | 8.37  | -0.01334 | 7.25 | 9.19  | 72.00  |
| 57 | 5525.4 | 11.4 | 6.23  | -0.00977 | 5.49 | 7.07  | 44.66  |
| 58 | 609.4  | 11.7 | 5.96  | -0.01471 | 5.00 | 7.01  | 40.42  |
| 59 | 1936.5 | 5.6  | 8.39  | -0.00619 | 7.41 | 10.03 | 40.26  |
| 60 | 665.1  | 8.8  | 10.38 | -0.01198 | 7.05 | 13.37 | 54.66  |
| 61 | 934.6  | 11.2 | 7.97  | -0.00854 | 6.70 | 8.95  | 46.55  |
| 62 | 1834.0 | 5.7  | 9.53  | -0.00980 | 7.02 | 12.61 | 45.83  |
| 63 | 931.8  | 4.8  | 10.22 | -0.01071 | 7.11 | 13.34 | 52.96  |
| 64 | 1711.0 | 3.8  | 7.88  | -0.01226 | 6.47 | 9.58  | 36.15  |
| 65 | 1110.4 | 3.4  | 8.73  | -0.01348 | 7.86 | 9.79  | 48.84  |
| 66 | 855.5  | 3.2  | 8.40  | -0.01283 | 7.57 | 9.22  | 46.21  |
| 67 | 3890.2 | 10.9 | 10.64 | -0.01105 | 7.40 | 13.52 | 62.20  |
| 68 | 2042.9 | 17.9 | 7.81  | -0.00636 | 6.03 | 10.78 | 37.92  |
| 69 | 2077.8 | 20.0 | 7.77  | -0.00577 | 7.05 | 8.78  | 91.02  |
| 70 | 1281.1 | 11.6 | 8.33  | -0.00857 | 7.42 | 9.73  | 50.56  |
| 71 | 2212.1 | 9.9  | 8.00  | -0.00677 | 6.18 | 11.03 | 28.84  |
| 72 | 1666.4 | 19.1 | 7.83  | -0.00659 | 7.16 | 8.83  | 95.11  |
| 73 | 1748.1 | 8.6  | 8.55  | -0.01657 | 7.79 | 9.42  | 57.09  |
| 74 | 1339.5 | 14.5 | 7.90  | -0.00820 | 5.80 | 10.53 | 28.90  |
| 75 | 1307.4 | 11.5 | 7.87  | -0.00687 | 5.93 | 10.79 | 31.94  |
| 76 | 1181.9 | 9.1  | 8.76  | -0.01013 | 7.90 | 9.60  | 59.36  |
| 77 | 2320.0 | 8.3  | 8.69  | 0.01033  | 7.80 | 9.45  | 57.57  |
| 78 | 3814.2 | 8.2  | 7.24  | -0.00996 | 5.87 | 8.86  | 33.87  |
| 79 | 1476.7 | 19.5 | 7.94  | -0.00946 | 7.20 | 8.52  | 102.43 |
| 80 | 1333.7 | 9.8  | 7.05  | -0.00823 | 5.77 | 8.73  | 33.55  |
| 81 | 1109.0 | 13.2 | 8.47  | -0.00630 | 7.22 | 10.39 | 43.35  |
| 82 | 1684.6 | 17.8 | 7.74  | 0.01542  | 6.65 | 8.67  | 77.95  |
| 83 | 2959.0 | 19.7 | 5.88  | 0.01587  | 4.86 | 6.90  | 42.55  |
| 84 | 1801.8 | 11.1 | 8.04  | 0.01608  | 7.04 | 8.91  | 58.71  |
| 85 | 6237.4 | 13.2 | 6.70  | -0.00962 | 5.83 | 7.82  | 43.78  |
| 86 | 3014.7 | 11.2 | 8.24  | -0.01525 | 6.92 | 9.06  | 51.49  |
| 87 | 2891.7 | 12.0 | 6.51  | -0.00864 | 5.74 | 7.65  | 29.87  |
| 88 | 1919.0 | 12.4 | 8.24  | -0.01770 | 7.24 | 8.91  | 54.99  |
| 89 | 1781.3 | 14.7 | 5.87  | -0.01570 | 4.98 | 6.84  | 27.54  |

|           |        |      |      |          |      |      |       |
|-----------|--------|------|------|----------|------|------|-------|
| <b>90</b> | 1696.3 | 22.6 | 6.81 | -0.00883 | 5.87 | 8.17 | 51.99 |
| <b>91</b> | 1505.9 | 21.1 | 5.71 | -0.01592 | 4.79 | 6.53 | 31.82 |
| <b>92</b> | 1330.1 | 22.3 | 5.67 | -0.01426 | 4.72 | 6.46 | 32.44 |

| <b>RVFNIM</b> |        |      |       |          |      |       |       |
|---------------|--------|------|-------|----------|------|-------|-------|
| <b>1</b>      | 3317.7 | 20.6 | 7.75  | -0.01295 | 6.08 | 9.25  | 53.59 |
| <b>2</b>      | 2101.9 | 13.8 | 7.98  | -0.01331 | 6.15 | 9.50  | 52.72 |
| <b>3</b>      | 599.2  | 13.6 | 7.65  | 0.00831  | 6.23 | 9.42  | 45.05 |
| <b>4</b>      | 1026.0 | 22.0 | 7.53  | 0.01265  | 6.81 | 8.42  | 55.26 |
| <b>5</b>      | 1335.8 | 23.3 | 7.48  | 0.01270  | 6.76 | 8.44  | 58.52 |
| <b>6</b>      | 1034.8 | 23.6 | 7.50  | 0.01254  | 6.72 | 8.37  | 60.36 |
| <b>7</b>      | 1368.0 | 21.4 | 7.51  | 0.01313  | 6.83 | 8.36  | 61.64 |
| <b>8</b>      | 838.9  | 12.0 | 7.39  | -0.00171 | 4.62 | 8.17  | 53.15 |
| <b>9</b>      | 780.5  | 27.9 | 5.43  | -0.00639 | 5.25 | 6.10  | 50.30 |
| <b>10</b>     | 2265.4 | 20.6 | 7.53  | 0.01235  | 6.83 | 8.37  | 62.36 |
| <b>11</b>     | 1961.4 | 20.6 | 7.54  | 0.01273  | 6.78 | 8.38  | 63.12 |
| <b>12</b>     | 1178.0 | 14.6 | 7.68  | 0.01356  | 6.95 | 8.47  | 52.26 |
| <b>13</b>     | 945.3  | 9.4  | 10.56 | -0.00845 | 8.25 | 12.43 | 77.25 |
| <b>14</b>     | 2370.6 | 9.2  | 10.25 | -0.00885 | 8.10 | 12.09 | 74.65 |
| <b>15</b>     | 1186.8 | 9.7  | 7.31  | 0.01430  | 6.49 | 8.23  | 42.41 |
| <b>16</b>     | 2632.4 | 8.9  | 10.64 | -0.00873 | 8.33 | 12.38 | 78.72 |
| <b>17</b>     | 4683.1 | 9.6  | 10.61 | -0.00832 | 8.47 | 12.51 | 73.51 |
| <b>18</b>     | 619.6  | 9.8  | 7.12  | 0.00965  | 6.45 | 8.14  | 39.40 |
| <b>19</b>     | 4566.4 | 10.5 | 10.73 | -0.00860 | 8.38 | 12.82 | 84.25 |
| <b>20</b>     | 802.6  | 10.1 | 7.17  | 0.00995  | 6.46 | 8.06  | 47.28 |
| <b>21</b>     | 3126.0 | 9.9  | 7.30  | 0.01311  | 6.63 | 8.15  | 38.89 |
| <b>22</b>     | 1813.5 | 8.0  | 10.47 | -0.00826 | 8.37 | 12.19 | 70.84 |
| <b>23</b>     | 3011.8 | 8.2  | 10.69 | -0.00863 | 8.57 | 12.58 | 74.25 |
| <b>24</b>     | 1573.3 | 9.5  | 10.67 | -0.00826 | 8.32 | 12.51 | 75.44 |
| <b>25</b>     | 1579.1 | 10.7 | 10.76 | -0.00886 | 8.38 | 12.49 | 83.57 |
| <b>26</b>     | 3791.1 | 8.5  | 10.75 | -0.00844 | 8.46 | 12.76 | 78.81 |
| <b>27</b>     | 1652.4 | 7.3  | 10.31 | -0.00786 | 7.94 | 12.54 | 64.46 |
| <b>28</b>     | 2179.7 | 7.1  | 10.54 | -0.00917 | 8.47 | 12.69 | 69.99 |
| <b>29</b>     | 1174.8 | 7.1  | 10.73 | -0.00850 | 8.53 | 12.74 | 72.98 |
| <b>30</b>     | 952.2  | 8.6  | 9.54  | 0.00036  | 7.45 | 11.69 | 47.97 |
| <b>31</b>     | 1210.0 | 16.4 | 11.02 | -0.00990 | 8.51 | 13.49 | 82.12 |
| <b>32</b>     | 3410.2 | 6.0  | 10.24 | 0.00703  | 9.25 | 11.47 | 68.18 |
| <b>33</b>     | 1113.3 | 6.0  | 8.33  | 0.00628  | 7.25 | 9.57  | 45.06 |
| <b>34</b>     | 1078.1 | 6.4  | 8.48  | 0.01018  | 7.36 | 9.84  | 40.70 |
| <b>35</b>     | 3020.5 | 8.3  | 9.53  | 0.00629  | 7.80 | 11.41 | 52.48 |
| <b>36</b>     | 1388.7 | 8.6  | 10.45 | 0.00862  | 9.22 | 11.62 | 73.12 |
| <b>37</b>     | 1324.3 | 12.0 | 9.76  | 0.00452  | 7.17 | 14.43 | 46.67 |
| <b>38</b>     | 1505.9 | 16.7 | 10.67 | -0.00929 | 8.15 | 12.92 | 77.57 |
| <b>39</b>     | 3087.2 | 8.1  | 11.55 | -0.00777 | 9.30 | 13.68 | 86.29 |
| <b>40</b>     | 1765.3 | 6.8  | 11.58 | -0.00792 | 9.10 | 13.68 | 86.69 |
| <b>41</b>     | 922.3  | 11.6 | 11.39 | -0.00866 | 9.10 | 13.32 | 92.91 |
| <b>42</b>     | 4920.1 | 10.3 | 11.36 | -0.00792 | 9.17 | 13.38 | 86.04 |
| <b>43</b>     | 1809.3 | 15.9 | 7.88  | -0.01160 | 6.19 | 9.72  | 40.10 |
| <b>44</b>     | 4380.3 | 13.8 | 6.80  | 0.00890  | 6.06 | 7.36  | 43.37 |
| <b>45</b>     | 3154.7 | 13.7 | 8.24  | -0.01109 | 6.54 | 10.06 | 38.83 |
| <b>46</b>     | 1537.9 | 12.4 | 7.83  | -0.01234 | 6.10 | 9.50  | 38.63 |
| <b>47</b>     | 2909.5 | 10.7 | 7.19  | -0.01305 | 5.68 | 9.12  | 33.28 |
| <b>48</b>     | 4561.5 | 5.1  | 8.51  | 0.01030  | 7.63 | 9.50  | 47.76 |
| <b>49</b>     | 4450.2 | 8.1  | 7.28  | -0.04380 | 6.68 | 7.83  | 41.83 |

|           |         |      |       |          |       |       |        |
|-----------|---------|------|-------|----------|-------|-------|--------|
| <b>50</b> | 6172.9  | 3.5  | 8.53  | 0.00939  | 6.75  | 10.79 | 40.14  |
| <b>51</b> | 6750.0  | 3.5  | 12.14 | -0.00933 | 10.43 | 13.98 | 86.67  |
| <b>52</b> | 668.0   | 3.7  | 10.28 | 0.00895  | 9.47  | 11.50 | 60.32  |
| <b>53</b> | 5168.0  | 4.1  | 10.08 | 0.01006  | 9.23  | 11.23 | 62.88  |
| <b>54</b> | 3966.8  | 4.3  | 10.17 | 0.00857  | 9.28  | 11.35 | 59.71  |
| <b>55</b> | 1016.6  | 4.4  | 10.09 | 0.00982  | 9.18  | 11.20 | 67.10  |
| <b>56</b> | 3366.3  | 7.4  | 10.38 | 0.00624  | 7.38  | 15.34 | 43.17  |
| <b>57</b> | 2437.5  | 4.0  | 10.01 | 0.00984  | 9.19  | 11.18 | 60.20  |
| <b>58</b> | 3799.8  | 4.2  | 7.78  | 0.00605  | 7.33  | 8.55  | 42.93  |
| <b>59</b> | 10898.5 | 2.4  | 10.01 | 0.01000  | 9.17  | 11.14 | 65.11  |
| <b>60</b> | 1628.9  | 4.2  | 9.98  | 0.01104  | 9.17  | 11.21 | 59.07  |
| <b>61</b> | 738.3   | 2.6  | 7.81  | -0.01079 | 7.48  | 8.55  | 45.57  |
| <b>62</b> | 963.9   | 2.5  | 7.83  | 0.00621  | 7.39  | 8.52  | 45.64  |
| <b>63</b> | 3293.0  | 2.5  | 7.94  | -0.01730 | 7.39  | 8.56  | 47.36  |
| <b>64</b> | 1292.0  | 4.3  | 9.98  | 0.01081  | 9.18  | 11.14 | 60.61  |
| <b>65</b> | 1895.5  | 3.6  | 8.91  | -0.00896 | 7.75  | 10.18 | 49.54  |
| <b>66</b> | 1558.6  | 4.9  | 10.11 | 0.00897  | 9.19  | 11.19 | 66.45  |
| <b>67</b> | 6820.3  | 4.5  | 9.87  | 0.00718  | 8.99  | 10.96 | 62.40  |
| <b>68</b> | 5302.2  | 6.0  | 9.86  | 0.00324  | 2.77  | 10.65 | 74.72  |
| <b>69</b> | 1199.3  | 5.5  | 6.62  | -0.02746 | 5.88  | 7.32  | 32.52  |
| <b>70</b> | 1733.4  | 7.8  | 9.14  | -0.00865 | 7.14  | 11.39 | 52.15  |
| <b>71</b> | 1277.4  | 5.6  | 8.16  | 0.00703  | 6.50  | 10.53 | 33.97  |
| <b>72</b> | 5956.1  | 4.3  | 10.18 | 0.01007  | 9.21  | 11.38 | 75.36  |
| <b>73</b> | 530.3   | 15.2 | 3.34  | -0.01315 | 2.83  | 4.15  | 8.11   |
| <b>74</b> | 865.8   | 7.3  | 4.33  | 0.01614  | 3.91  | 5.12  | 12.65  |
| <b>75</b> | 5804.1  | 6.8  | 9.17  | 0.00964  | 7.86  | 10.65 | 51.21  |
| <b>76</b> | 3022.0  | 9.4  | 5.74  | -0.00331 | 5.05  | 6.54  | 19.74  |
| <b>77</b> | 797.7   | 8.7  | 6.67  | -0.02747 | 5.86  | 7.42  | 32.31  |
| <b>78</b> | 6887.7  | 7.2  | 10.92 | -0.00145 | 9.55  | 12.82 | 85.12  |
| <b>79</b> | 3433.6  | 11.8 | 10.41 | -0.01847 | 5.91  | 13.51 | 64.64  |
| <b>80</b> | 16708.1 | 15.3 | 9.84  | 0.00934  | 8.89  | 10.74 | 100.25 |
| <b>81</b> | 1790.1  | 18.3 | 8.86  | 0.01005  | 7.90  | 9.74  | 95.32  |
| <b>82</b> | 7555.8  | 17.8 | 9.40  | -0.00939 | 8.38  | 10.64 | 95.63  |
| <b>83</b> | 2493.2  | 9.8  | 7.46  | 0.00801  | 5.51  | 10.43 | 42.50  |
| <b>84</b> | 5311.6  | 7.9  | 11.66 | 0.00903  | 9.90  | 13.50 | 93.44  |
| <b>85</b> | 2159.2  | 8.1  | 7.30  | 0.00879  | 5.62  | 9.85  | 31.94  |
| <b>86</b> | 4060.6  | 10.8 | 8.56  | -0.00763 | 6.96  | 10.59 | 51.36  |
| <b>87</b> | 1928.1  | 12.9 | 7.27  | 0.00311  | 6.15  | 9.40  | 31.21  |
| <b>88</b> | 949.2   | 13.6 | 8.32  | -0.01367 | 6.99  | 9.84  | 43.15  |
| <b>89</b> | 6758.9  | 11.1 | 7.24  | -0.01257 | 6.06  | 8.72  | 39.55  |

**VIYKI**

|           |        |      |       |          |       |       |        |
|-----------|--------|------|-------|----------|-------|-------|--------|
| <b>1</b>  | 1306.7 | 12.8 | 9.56  | -0.00687 | 8.61  | 10.77 | 75.36  |
| <b>2</b>  | 3902.4 | 14.1 | 9.63  | -0.00666 | 8.80  | 10.61 | 83.29  |
| <b>3</b>  | 2768.6 | 8.5  | 9.82  | -0.00650 | 9.04  | 10.60 | 72.35  |
| <b>4</b>  | 3770.5 | 6.1  | 9.76  | -0.02147 | 8.99  | 10.48 | 59.62  |
| <b>5</b>  | 2941.4 | 13.3 | 9.45  | -0.02581 | 8.67  | 10.18 | 97.81  |
| <b>6</b>  | 5411.1 | 12.2 | 9.64  | -0.01515 | 8.86  | 10.38 | 83.65  |
| <b>7</b>  | 3014.7 | 15.3 | 9.91  | 0.01890  | 9.26  | 11.03 | 84.79  |
| <b>8</b>  | 3969.8 | 4.8  | 10.49 | -0.02241 | 9.82  | 11.15 | 86.68  |
| <b>9</b>  | 1869.2 | 11.9 | 11.25 | 0.01443  | 10.37 | 12.40 | 105.72 |
| <b>10</b> | 1460.5 | 9.9  | 9.54  | -0.02392 | 8.86  | 10.14 | 83.66  |
| <b>11</b> | 3952.3 | 7.7  | 9.67  | -0.01416 | 8.93  | 10.29 | 72.27  |
| <b>12</b> | 1983.5 | 9.1  | 9.60  | -0.00806 | 8.76  | 10.36 | 70.86  |

|    |         |      |       |          |       |       |        |
|----|---------|------|-------|----------|-------|-------|--------|
| 13 | 6403.2  | 11.3 | 9.48  | -0.01561 | 8.72  | 10.16 | 84.75  |
| 14 | 872.8   | 8.8  | 9.62  | -0.02173 | 8.80  | 10.25 | 71.63  |
| 15 | 2708.9  | 8.9  | 10.50 | -0.01365 | 9.69  | 11.72 | 66.02  |
| 16 | 814.1   | 5.4  | 9.69  | -0.01348 | 9.02  | 10.38 | 55.49  |
| 17 | 5558.3  | 2.5  | 9.69  | -0.01367 | 9.03  | 10.33 | 64.84  |
| 18 | 951.8   | 4.8  | 10.22 | -0.02307 | 9.62  | 10.87 | 70.11  |
| 19 | 6946.5  | 2.2  | 9.46  | -0.00648 | 7.66  | 10.76 | 57.19  |
| 20 | 3951.3  | 6.6  | 9.49  | -0.01012 | 7.82  | 11.09 | 59.94  |
| 21 | 4168.0  | 7.7  | 10.03 | -0.02134 | 9.29  | 10.68 | 69.67  |
| 22 | 4050.8  | 8.5  | 11.01 | -0.00642 | 9.76  | 12.43 | 77.84  |
| 23 | 2574.6  | 7.5  | 10.38 | -0.01513 | 9.57  | 11.10 | 76.78  |
| 24 | 1801.3  | 7.6  | 10.31 | -0.01497 | 9.61  | 11.00 | 75.82  |
| 25 | 3488.4  | 10.2 | 9.80  | -0.01261 | 9.08  | 10.51 | 65.85  |
| 26 | 2562.4  | 8.5  | 9.87  | -0.00546 | 8.01  | 11.01 | 60.63  |
| 27 | 1144.3  | 10.8 | 9.74  | -0.00523 | 8.66  | 11.30 | 53.32  |
| 28 | 3482.5  | 10.3 | 9.87  | -0.01808 | 9.16  | 10.53 | 67.28  |
| 29 | 704.7   | 11.7 | 10.02 | -0.01131 | 9.07  | 11.40 | 58.51  |
| 30 | 3307.8  | 9.5  | 9.88  | -0.01058 | 9.16  | 10.68 | 68.44  |
| 31 | 2402.2  | 8.5  | 9.97  | -0.00499 | 8.13  | 11.25 | 58.61  |
| 32 | 5220.7  | 5.3  | 14.82 | -0.00996 | 13.65 | 16.08 | 155.04 |
| 33 | 5677.8  | 5.4  | 9.46  | -0.00951 | 7.19  | 11.27 | 128.53 |
| 34 | 12767.6 | 5.3  | 14.13 | -0.00070 | 12.86 | 16.25 | 123.08 |
| 35 | 1895.5  | 5.3  | 8.30  | -0.01212 | 6.54  | 9.95  | 52.77  |
| 36 | 4488.3  | 5.9  | 12.70 | -0.01158 | 11.09 | 14.07 | 114.90 |
| 37 | 3580.1  | 5.2  | 14.05 | -0.00503 | 13.08 | 15.21 | 142.31 |
| 38 | 3240.2  | 3.0  | 12.99 | -0.01018 | 11.64 | 14.18 | 118.56 |
| 39 | 2050.8  | 2.9  | 12.90 | -0.01023 | 11.71 | 13.97 | 118.45 |
| 40 | 1957.0  | 4.7  | 9.12  | -0.00766 | 7.60  | 10.75 | 59.94  |
| 41 | 1716.8  | 5.8  | 14.19 | -0.01571 | 13.44 | 14.92 | 149.40 |
| 42 | 5619.2  | 9.0  | 14.10 | -0.02081 | 12.58 | 15.80 | 172.76 |
| 43 | 1804.8  | 4.8  | 12.82 | -0.01162 | 11.76 | 13.53 | 121.96 |
| 44 | 3958.0  | 9.6  | 14.02 | -0.00934 | 13.29 | 14.81 | 153.36 |
| 45 | 2836.0  | 9.0  | 12.62 | -0.01022 | 10.16 | 14.29 | 149.29 |
| 46 | 665.0   | 5.0  | 12.44 | -0.00899 | 9.21  | 14.17 | 120.73 |
| 47 | 1198.3  | 9.3  | 12.91 | -0.00999 | 11.88 | 13.78 | 126.90 |
| 48 | 1207.0  | 3.1  | 8.47  | -0.01488 | 6.75  | 9.97  | 44.71  |
| 49 | 770.5   | 5.7  | 8.19  | -0.01425 | 6.64  | 9.71  | 51.21  |
| 50 | 4133.8  | 5.7  | 8.68  | -0.01427 | 7.09  | 10.04 | 54.75  |
| 51 | 2097.7  | 5.7  | 8.48  | -0.01238 | 6.89  | 10.05 | 54.08  |
| 52 | 565.4   | 7.8  | 6.08  | -0.01585 | 5.36  | 7.05  | 56.46  |
| 53 | 4749.0  | 3.5  | 6.23  | 0.00168  | 5.54  | 7.13  | 30.06  |
| 54 | 1271.5  | 2.6  | 8.55  | -0.01491 | 7.08  | 9.90  | 47.08  |
| 55 | 823.3   | 2.9  | 8.53  | -0.01334 | 6.94  | 9.98  | 45.39  |
| 56 | 1511.7  | 1.1  | 6.27  | -0.03569 | 5.71  | 6.87  | 48.89  |
| 57 | 477.5   | 3.3  | 8.47  | -0.01460 | 7.02  | 9.45  | 42.41  |
| 58 | 10878.0 | 12.8 | 8.80  | -0.01562 | 7.49  | 9.99  | 64.85  |
| 59 | 2214.9  | 10.6 | 8.94  | -0.01443 | 7.59  | 10.36 | 59.29  |
| 60 | 3012.7  | 12.2 | 9.48  | -0.01228 | 7.80  | 11.06 | 61.31  |
| 61 | 1317.5  | 11.5 | 6.73  | -0.01591 | 6.20  | 7.27  | 35.32  |
| 62 | 1461.0  | 9.2  | 8.38  | -0.01230 | 6.84  | 10.05 | 55.94  |
| 63 | 6555.3  | 12.1 | 6.68  | -0.03752 | 6.22  | 7.37  | 37.12  |
| 64 | 3340.6  | 8.6  | 9.34  | -0.01017 | 7.58  | 10.90 | 64.45  |
| 65 | 5198.4  | 3.4  | 8.03  | -0.01346 | 6.63  | 9.38  | 44.62  |
| 66 | 1679.1  | 5.2  | 8.39  | -0.01249 | 6.96  | 9.96  | 44.54  |

|           |        |      |       |          |       |       |        |
|-----------|--------|------|-------|----------|-------|-------|--------|
| <b>67</b> | 2332.5 | 2.8  | 7.31  | -0.01413 | 6.72  | 8.33  | 38.99  |
| <b>68</b> | 2124.5 | 4.9  | 9.04  | -0.01411 | 7.53  | 10.67 | 56.58  |
| <b>69</b> | 7116.3 | 16.1 | 11.82 | -0.01222 | 10.97 | 12.74 | 111.69 |
| <b>70</b> | 2097.7 | 16.7 | 10.19 | -0.00714 | 9.14  | 11.36 | 86.84  |
| <b>71</b> | 1333.0 | 4.3  | 6.46  | -0.03744 | 5.88  | 7.18  | 31.12  |
| <b>72</b> | 2097.7 | 4.4  | 6.94  | -0.01762 | 6.35  | 7.99  | 35.76  |
| <b>73</b> | 1048.9 | 4.5  | 6.42  | 0.03711  | 5.95  | 7.13  | 48.25  |
| <b>74</b> | 1145.5 | 4.6  | 6.51  | -0.03834 | 5.96  | 7.14  | 32.16  |
| <b>75</b> | 2774.4 | 4.6  | 6.46  | -0.03781 | 5.96  | 7.08  | 29.69  |
| <b>76</b> | 5845.3 | 11.1 | 6.16  | -0.01778 | 5.36  | 7.13  | 35.51  |
| <b>77</b> | 1549.6 | 7.2  | 6.24  | 0.03739  | 5.74  | 6.86  | 36.13  |
| <b>78</b> | 846.7  | 5.3  | 8.81  | -0.01532 | 7.47  | 10.10 | 51.79  |
| <b>79</b> | 1974.6 | 6.6  | 6.52  | -0.03693 | 5.97  | 7.29  | 35.61  |
| <b>80</b> | 6820.4 | 4.2  | 7.11  | -0.01583 | 6.43  | 8.04  | 37.61  |
| <b>81</b> | 1541.0 | 5.1  | 9.04  | -0.01556 | 7.76  | 10.20 | 60.05  |
| <b>82</b> | 2862.3 | 5.0  | 6.61  | -0.01431 | 6.04  | 7.34  | 30.01  |
| <b>83</b> | 3518.6 | 5.8  | 8.20  | -0.01449 | 6.70  | 9.66  | 45.13  |
| <b>84</b> | 2493.2 | 5.0  | 6.50  | -0.03646 | 5.95  | 7.11  | 29.02  |
| <b>85</b> | 1095.7 | 5.5  | 8.30  | -0.01457 | 6.84  | 9.69  | 47.00  |

31

32

33

34

## HYFNIF

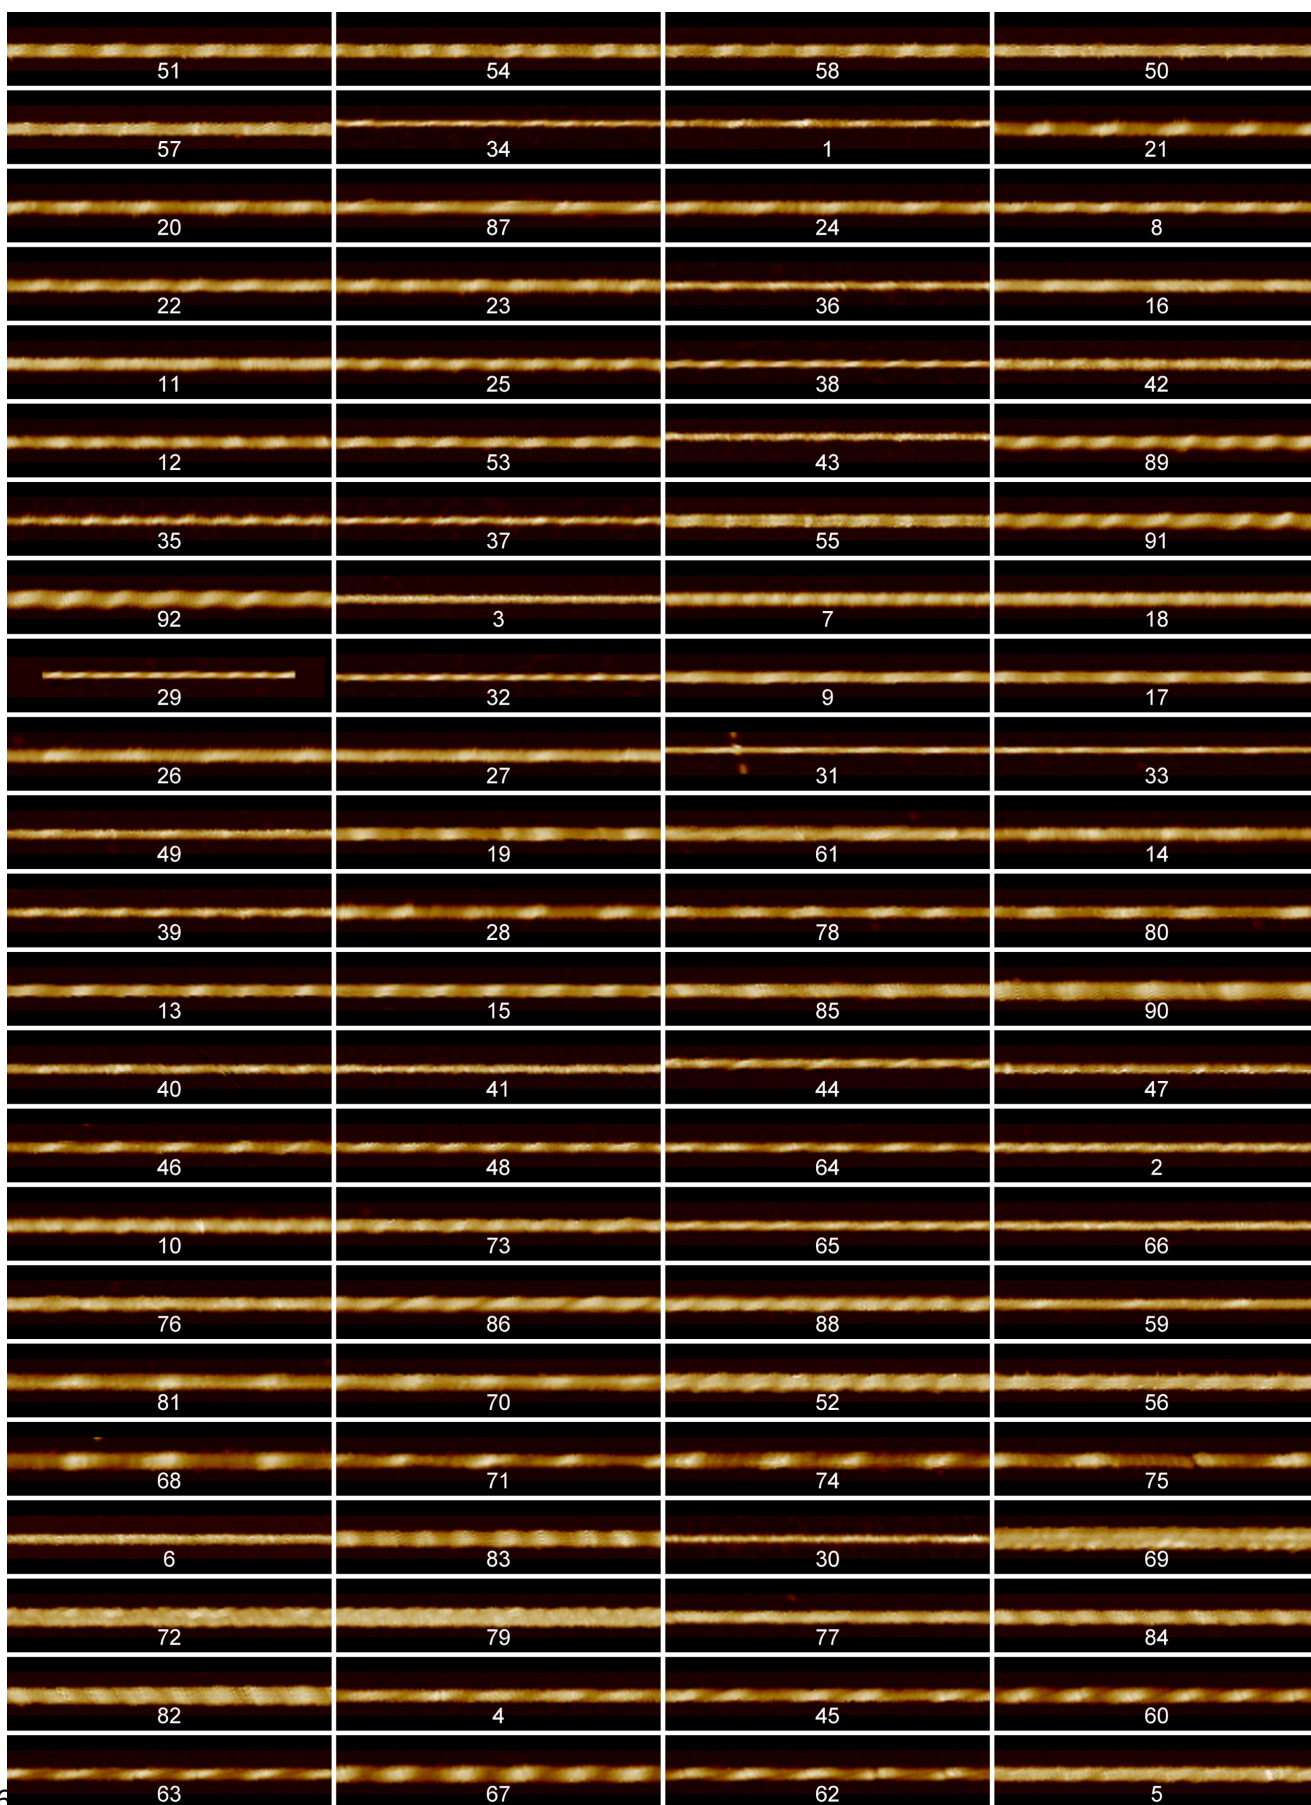



## RVFNIM

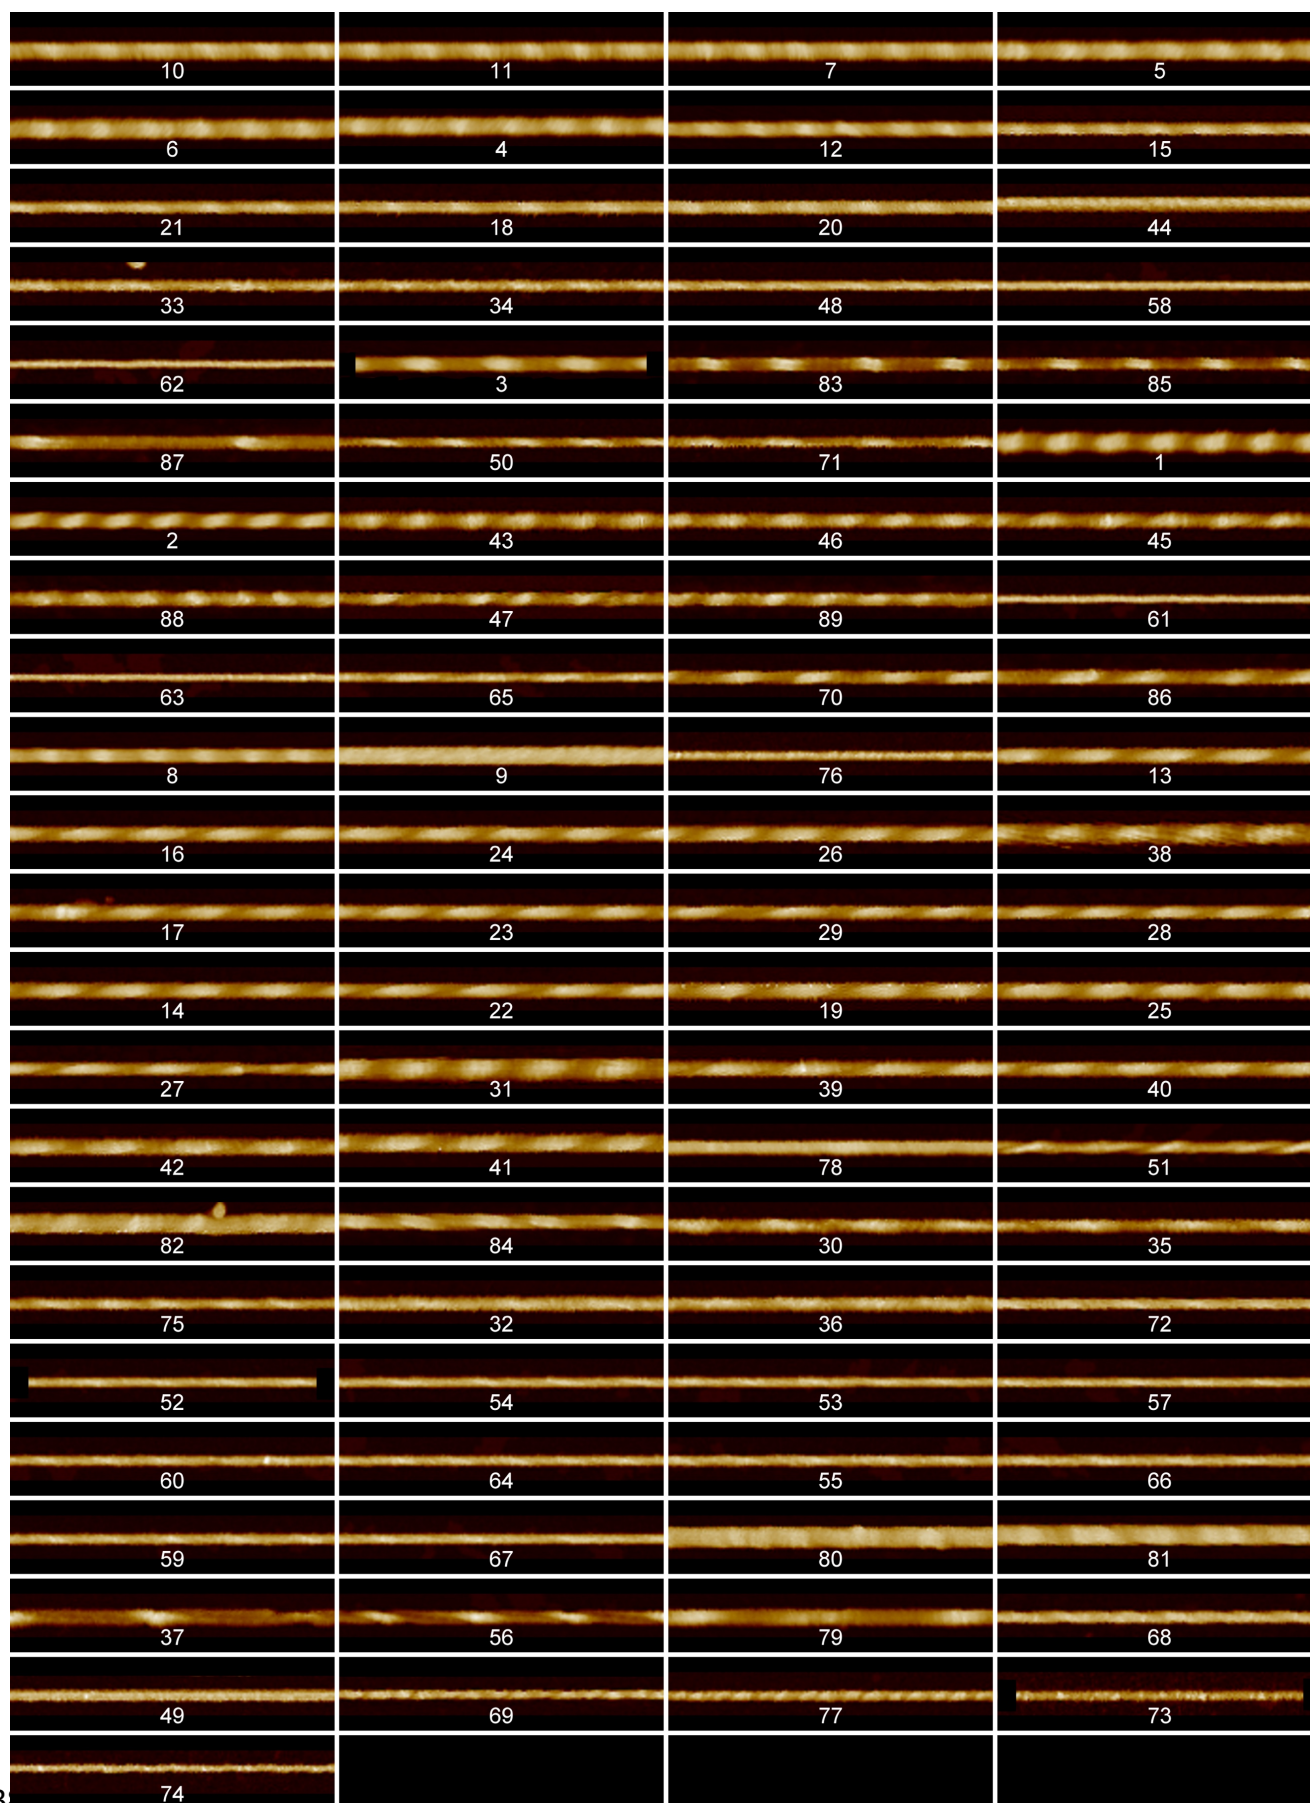

|    |    |    |    |
|----|----|----|----|
| 23 | 24 | 15 | 11 |
| 17 | 25 | 30 | 16 |
| 29 | 4  | 28 | 14 |
| 18 | 21 | 1  | 3  |
| 12 | 2  | 70 | 6  |
| 13 | 5  | 10 | 8  |
| 22 | 19 | 40 | 20 |
| 60 | 64 | 26 | 31 |
| 27 | 35 | 49 | 50 |
| 51 | 62 | 48 | 83 |
| 85 | 54 | 55 | 66 |
| 57 | 65 | 58 | 59 |
| 81 | 68 | 78 | 33 |
| 52 | 61 | 82 | 67 |
| 72 | 80 | 76 | 53 |
| 56 | 63 | 79 | 71 |
| 75 | 74 | 84 | 7  |
| 9  | 32 | 37 | 41 |
| 44 | 42 | 34 | 36 |
| 38 | 39 | 43 | 47 |
| 69 | 45 | 46 | 73 |
| 77 |    |    |    |

42 **Supplementary Figure SI 1: AFM image data sets for all of the individually traced fibrils.**

43 All fibrils displayed here were straightened and they were cropped to 500 nm segments for

44 visualisation here if the contour length is longer than 500 nm. No further processing occurred.

45 The fibrils are shown with their individual index numbers (see Supplementary Table SI 1), and

46 are arranged by similarity (see Figure 6 and Supplementary Figure 6).

47

48

49

50

51

### HYFNIF

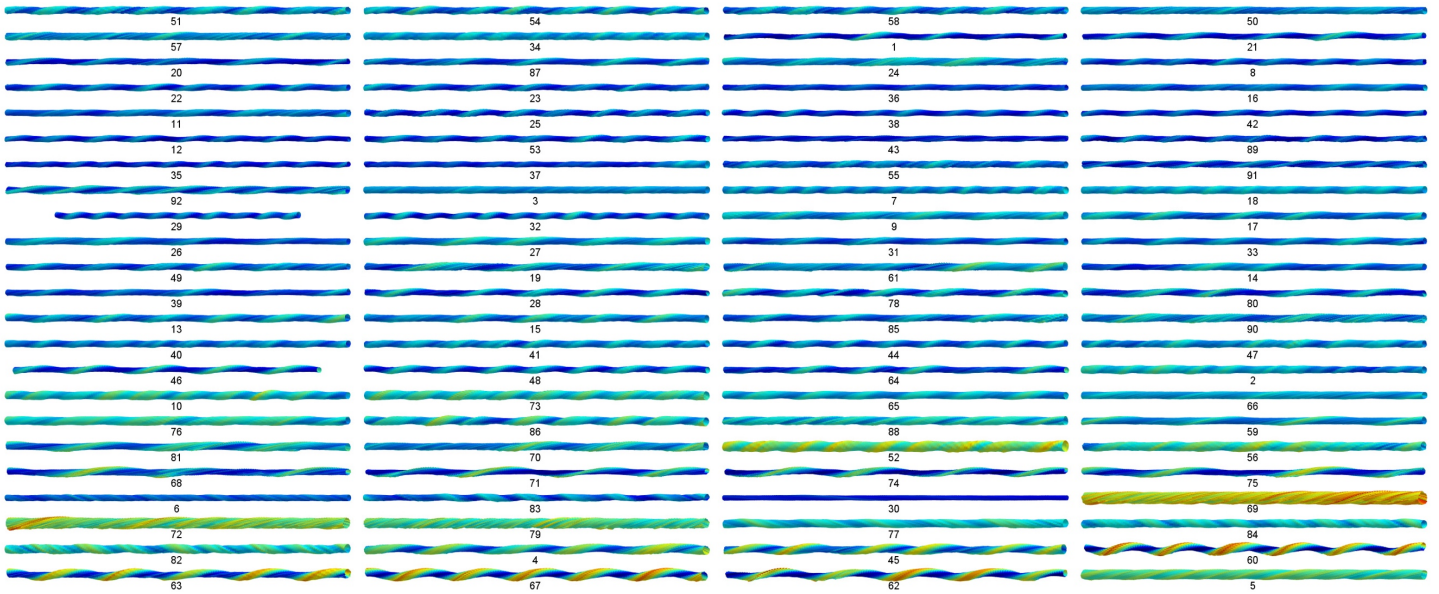

53

54

### RVFNIM

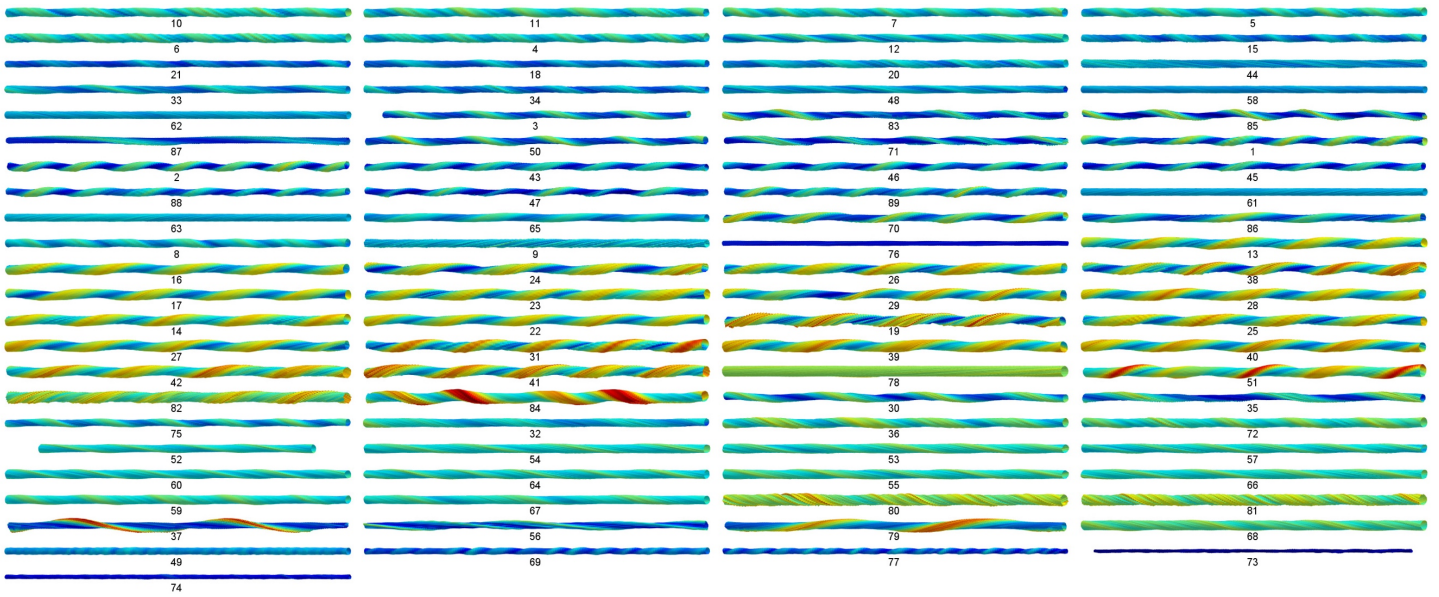

56

57

58

## VIYKI

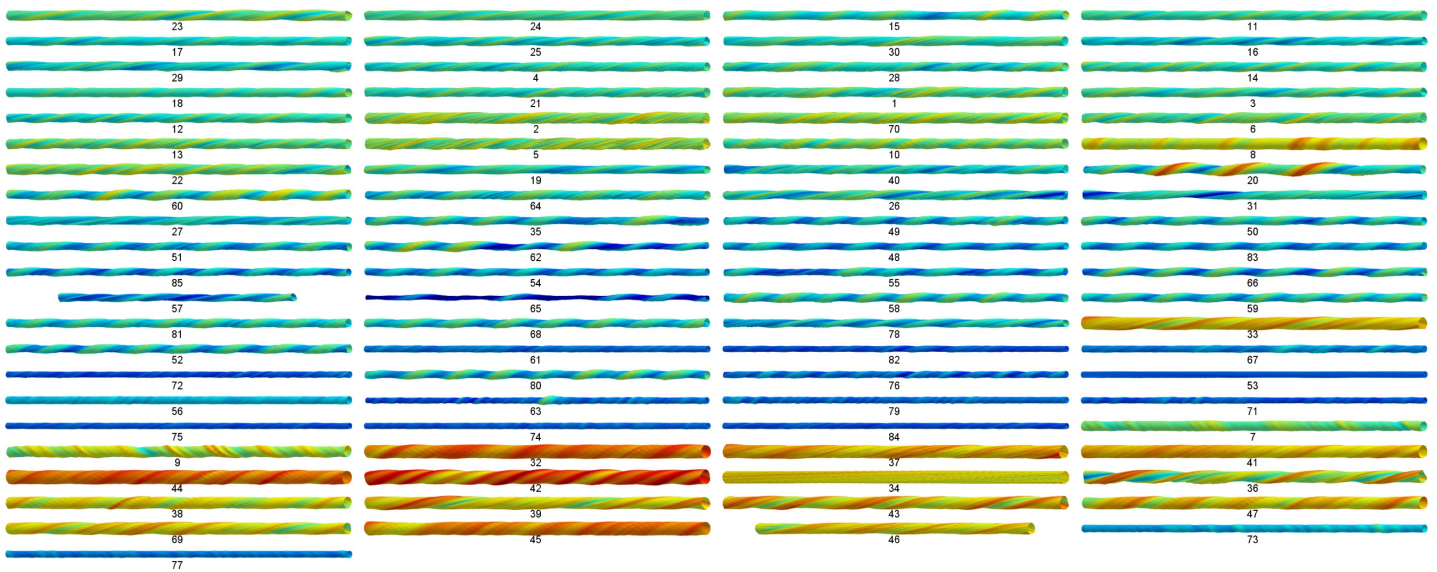

60

### 61 **Supplementary Figure SI 2: All 3D models of the Waltz peptide assemblies reconstructed**

62 **from the AFM data sets.** Each fibril in the three data sets was reconstructed as a 3D model  
63 using information and coordinates extracted directly from the AFM data. All of the models are  
64 shown with identical scale. All fibril models displayed here are cropped to 500 nm segments  
65 for visualisation here if the contour length is longer than 500 nm. The models are shown with  
66 their individual index numbers used throughout (see Supplementary Table SI 1), are arranged  
67 by similarity (see Figure 6 and Supplementary Figure 6), and are placed in the same order as  
68 Supplementary Table SI 2.

69

70

71

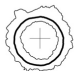

51

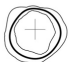

54

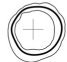

58

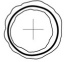

50

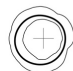

13

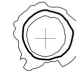

15

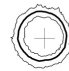

85

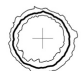

90

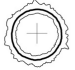

57

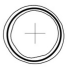

34

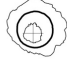

1

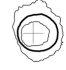

21

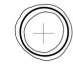

40

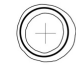

41

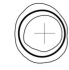

44

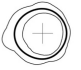

47

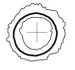

20

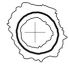

87

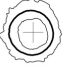

24

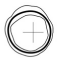

8

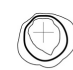

46

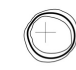

48

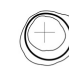

64

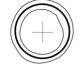

2

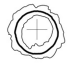

22

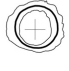

23

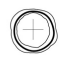

36

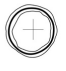

16

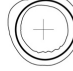

10

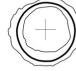

73

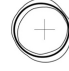

65

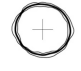

66

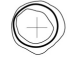

11

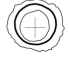

25

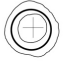

38

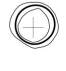

42

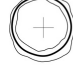

76

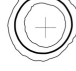

86

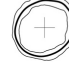

88

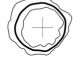

59

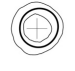

12

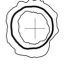

53

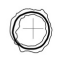

43

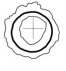

89

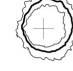

81

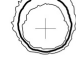

70

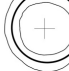

52

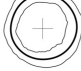

56

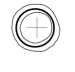

35

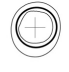

37

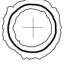

55

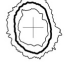

91

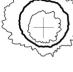

68

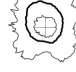

71

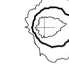

74

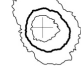

75

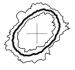

92

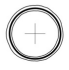

3

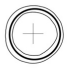

7

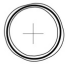

18

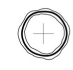

6

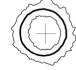

83

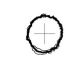

30

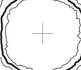

69

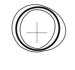

29

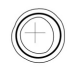

32

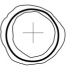

9

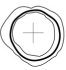

17

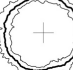

72

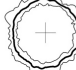

79

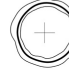

77

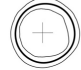

84

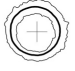

26

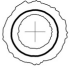

27

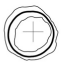

31

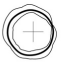

33

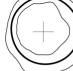

82

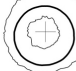

4

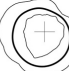

45

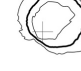

60

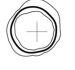

49

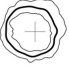

19

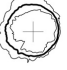

61

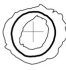

14

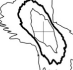

63

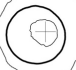

67

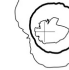

62

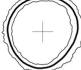

5

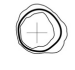

39

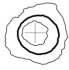

28

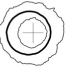

78

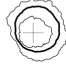

80

73

74

75

**RVFNIM**

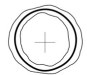

10

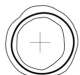

11

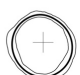

7

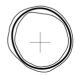

5

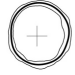

6

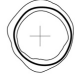

4

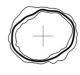

12

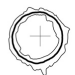

15

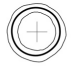

21

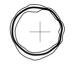

18

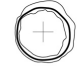

20

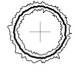

44

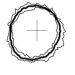

33

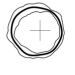

34

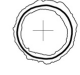

48

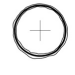

58

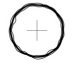

62

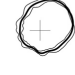

3

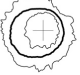

83

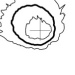

85

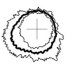

87

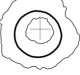

50

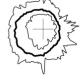

71

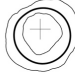

1

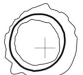

2

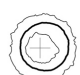

43

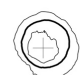

46

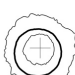

45

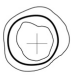

88

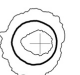

47

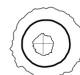

89

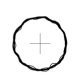

61

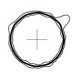

63

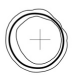

65

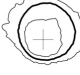

70

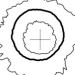

86

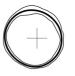

8

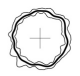

9

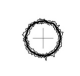

76

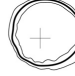

13

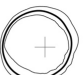

16

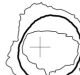

24

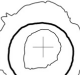

26

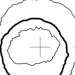

38

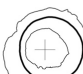

17

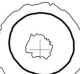

23

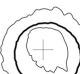

29

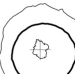

28

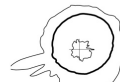

14

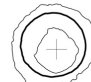

22

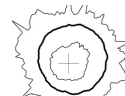

19

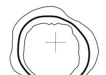

25

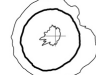

27

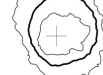

31

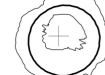

39

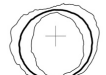

40

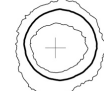

42

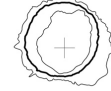

41

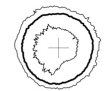

78

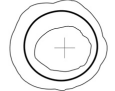

51

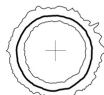

82

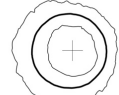

84

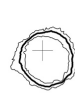

30

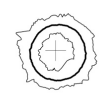

35

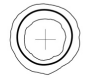

75

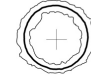

32

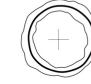

36

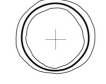

72

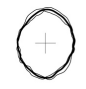

52

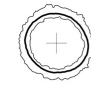

54

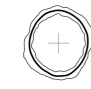

53

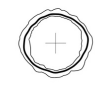

57

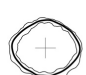

60

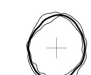

64

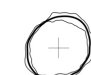

55

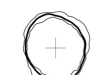

66

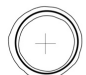

59

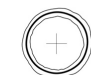

67

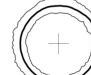

80

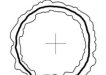

81

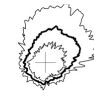

37

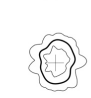

56

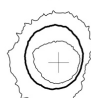

79

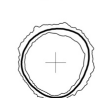

68

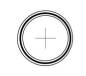

49

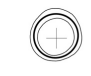

69

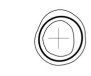

77

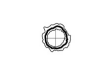

73

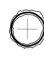

74

7.

78

79

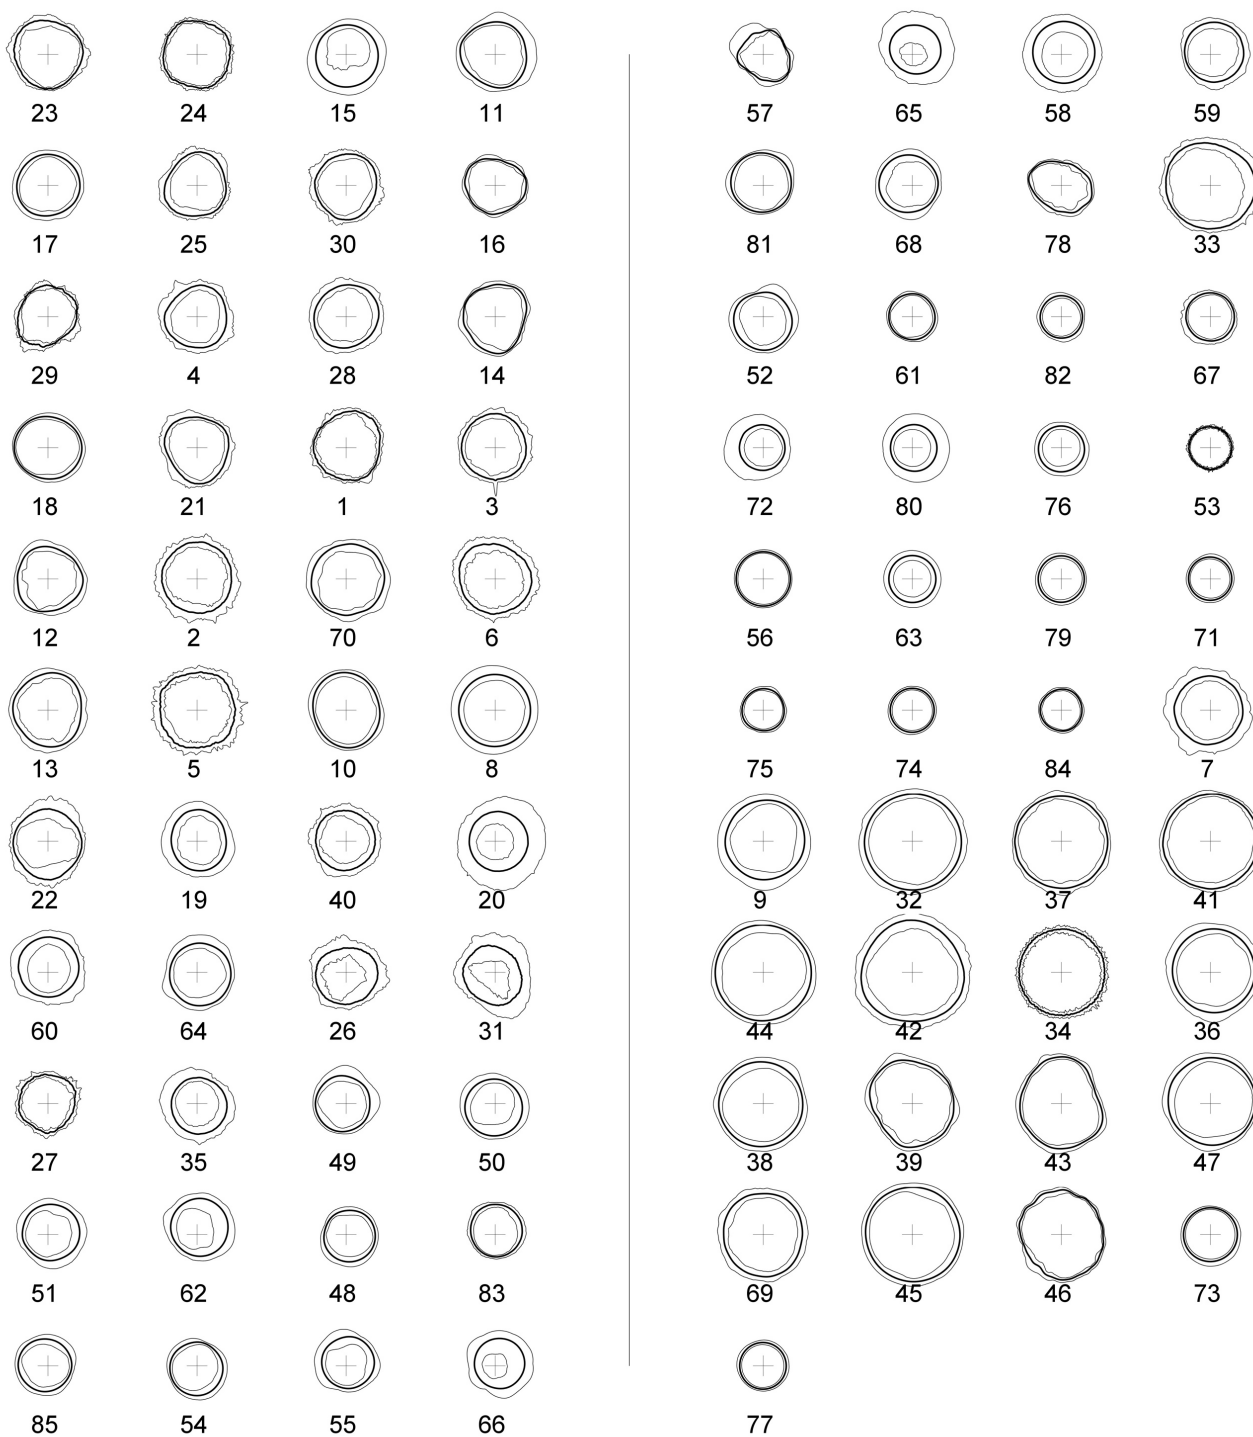

8

82 **Supplementary Figure SI 3: Average cross-sectional areas of all 3D models of the Waltz**  
 83 **peptide assemblies reconstructed from the AFM data sets.** For each fibril 3D model shown  
 84 in Supplementary Figure SI 3, the average cross-section for that individual fibril is shown as  
 85 thick solid line. The thin solid lines inside and outside the average cross-sections represent the



86 minimum and the maximum cross-sections, respectively. They reflect the variations observed  
87 in the fibril cross-sections. All of the models are shown with identical scale. The centre cross  
88 in each of the model cross-section represent their screw axis, and the length of the horizontal  
89 and vertical lines of the cross represent the length of 4 nm. The model cross-sections are shown  
90 with their individual index numbers used throughout (see Supplementary Table SI 1), are  
91 arranged by similarity (see Figure 6 and Supplementary Figure 6), and placed in the same order  
92 as Supplementary Table SI 2.

93

94

95

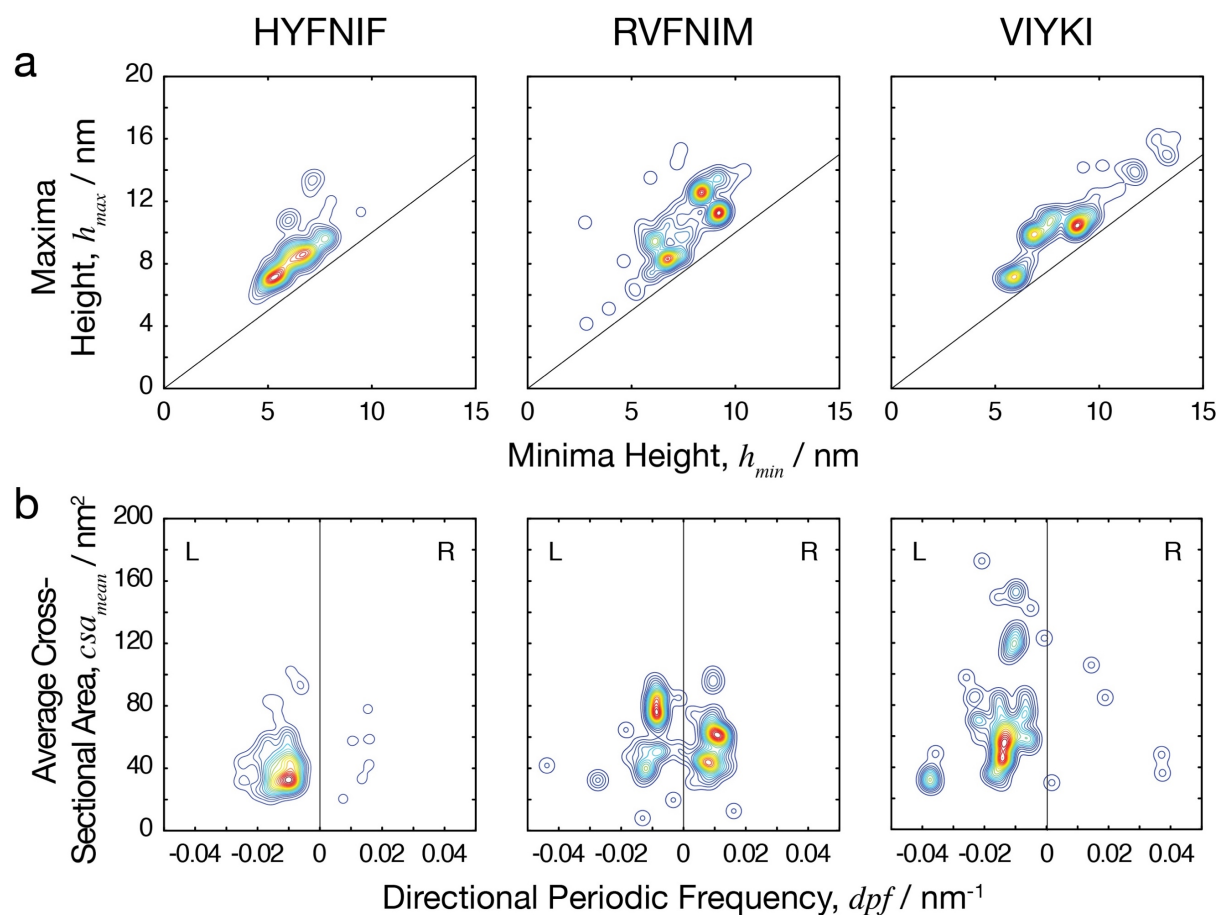

97

98

99 **Supplementary Figure SI 4: The heterogeneity of the Waltz peptide assemblies.** (a) The

100 maximum height of the fibrils plotted against the minimum height of the fibrils. (b) The average

101 cross-sectional area of the fibrils plotted against the number of repeating units per nm, with

102 negative and positive values to distinguish handedness (directional periodic frequency,  $dpf$ ).

103 The data is represented as a 2D histogram and visualised as a contour map, where the colouring

104 represents the density of the data-points.

105

106

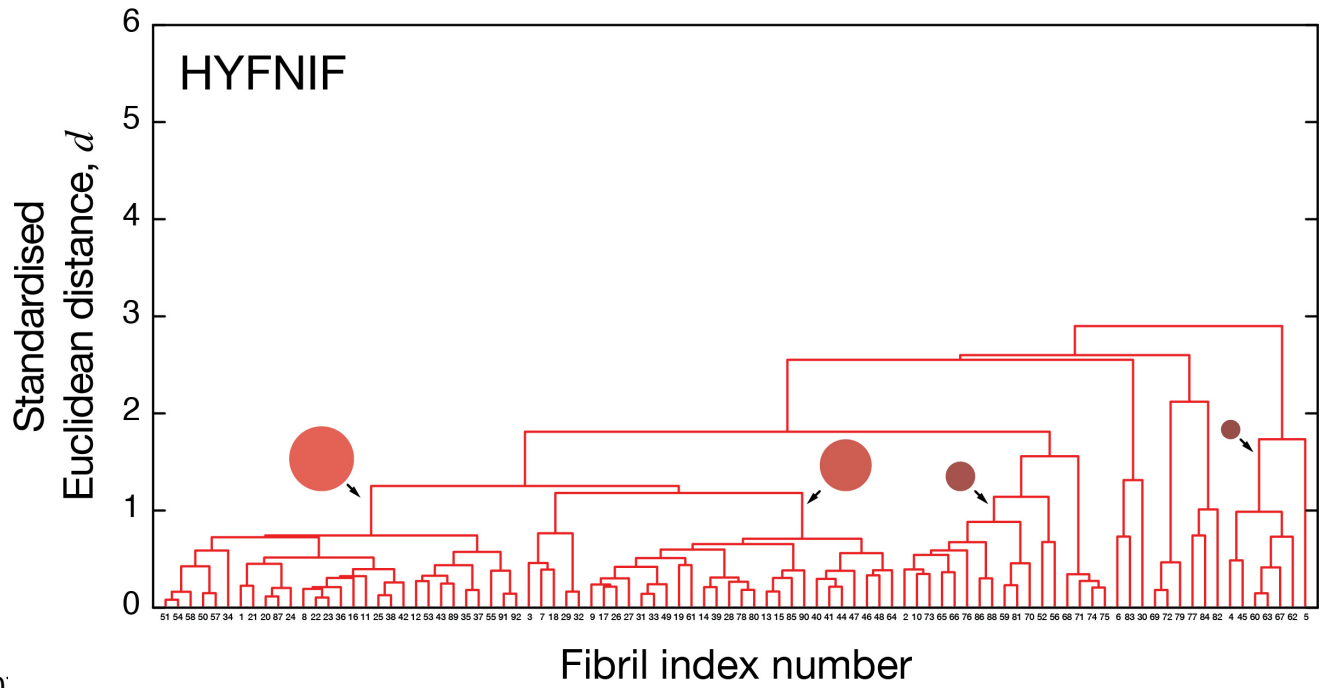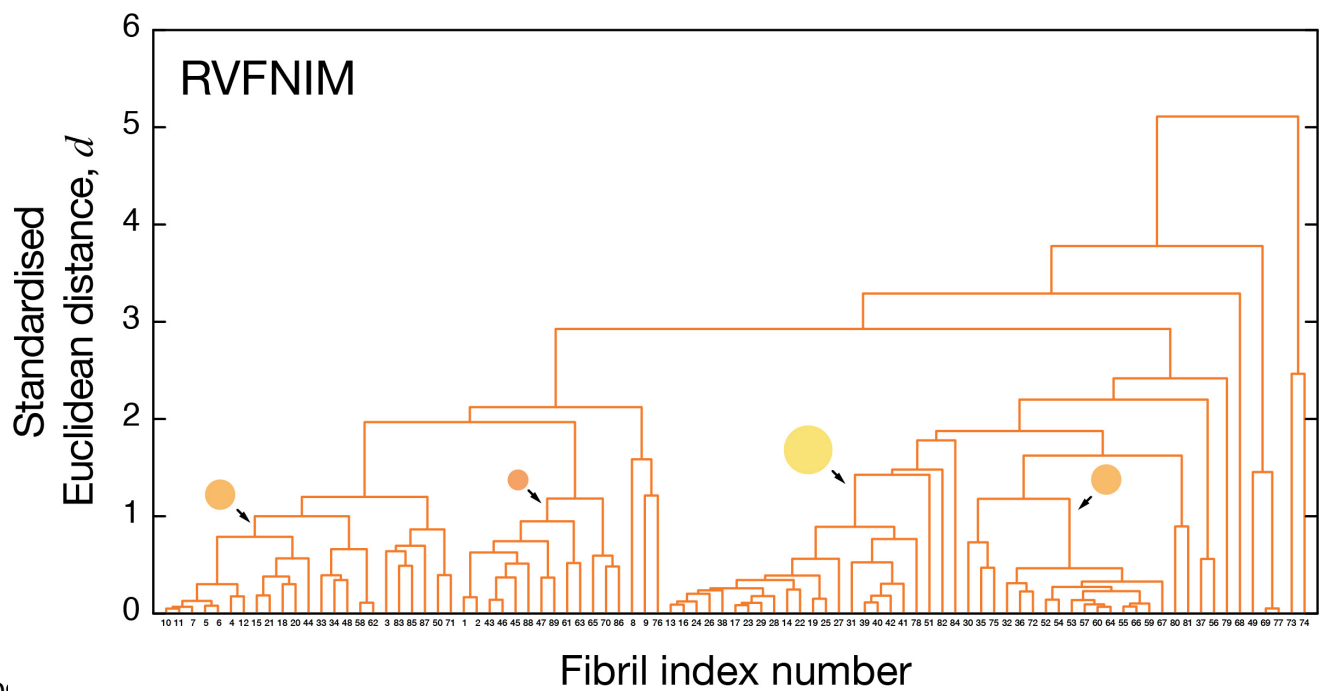

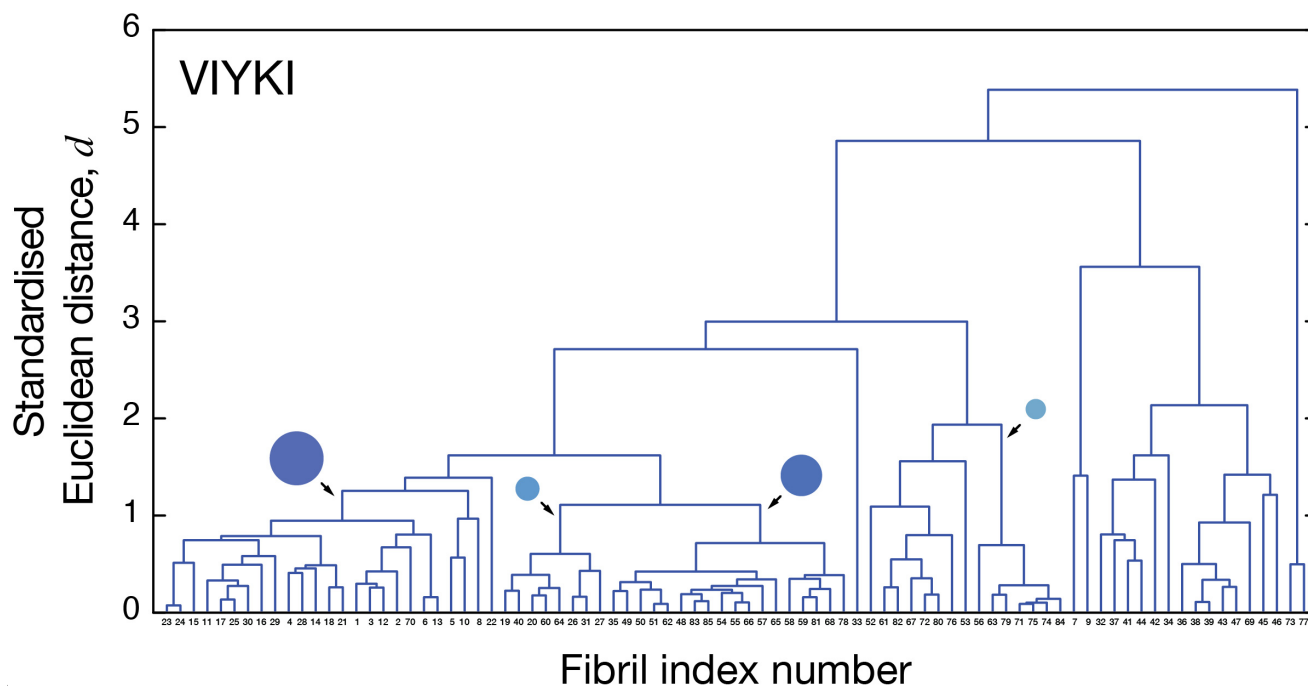

11  
 112  
 113 **Supplementary Figure SI 5: Analysis of structural similarity and objective classification**  
 114 **of fibril assemblies by agglomerative hierarchical clustering.** Full dendrograms  
 115 representing the full hierarchical relationship between each individual fibril is shown. For each  
 116 fibril, the individual numbers shown on the x-axis are the fibril index numbers used throughout  
 117 (see Supplementary Table SI 1). The x-axis represents the order in which structurally similar  
 118 fibrils were grouped together, and represent the same order used in Supplementary Figures SI  
 119 1, 2 and 3. The coloured circles represent the four largest class for each sample as shown in  
 120 Figure 6.

121  
 122

123

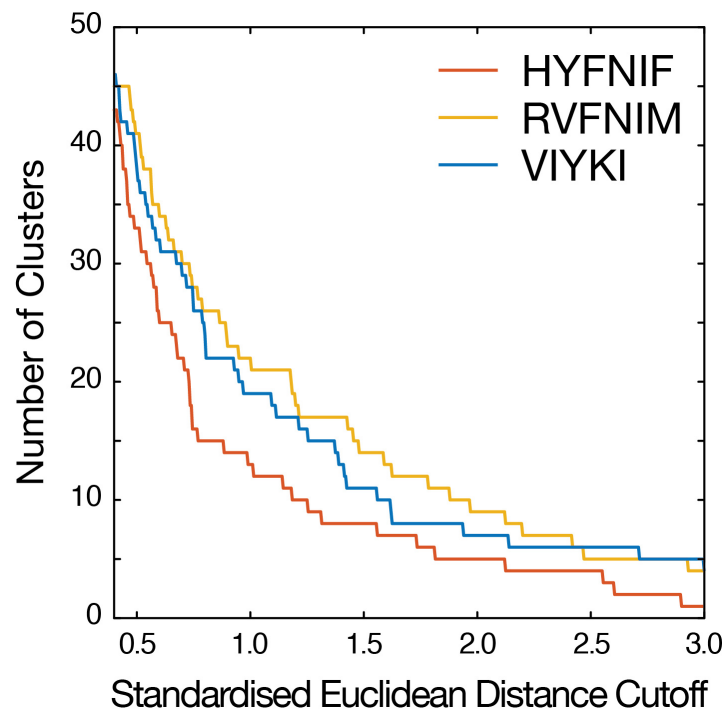

124

125

126 **Supplementary Figure SI 6: The number of clusters generated by agglomerative**

127 **hierarchical clustering as function of standardised Euclidean distance cut-off used. A**

128 standardised Euclidean distance cut-off of 1.0 was used to classify the fibrils in each data set

129 (Figure 6). HYFNIF fibrils show greatest similarity as measured by the standard deviation of

130 standardised Euclidean distances, and the data set can be described by smallest number of

131 clusters compared to RVFNIM and VIYKI fibrils, as expected. Despite the standard deviation

132 of standardised Euclidean distance for VIYKI fibrils is greatest of the three samples, roughly

133 the same number of clusters if not more are required to describe the entire RVFNIM data set.

134 This suggest that despite the VIYKI data set showing an overall greater variation, the RVFNIM

135 fibril structures is spread across smaller distances but more evenly compared to VIYKI fibrils.

136

137
